# Supplementary material for: Magnetically-induced synthesis of highly-crystalline ternary chalcopyrite nanocrystals under ambient conditions
Source: Royal Society of Chemistry journal article supplement (doi:10.1039/b918246b), 2010-01-01
Supplement: b918246b.pdf [file b918246b.pdf]

## Supplementary Information

### Magnetically-induced Synthesis of Highly-Crystalline Ternary Semiconductor Chalcopyrite Nanocrystals via a Magnetic Doping at ambient condition

Kuan-Ting Kuo, Shang-Hsiu Hu, Dean-Mo Liu\*, San-Yuan Chen\*

*Department of Materials Sciences and Engineering, National Chiao Tung University, Hsinchu,*

*Taiwan, 300, ROC*

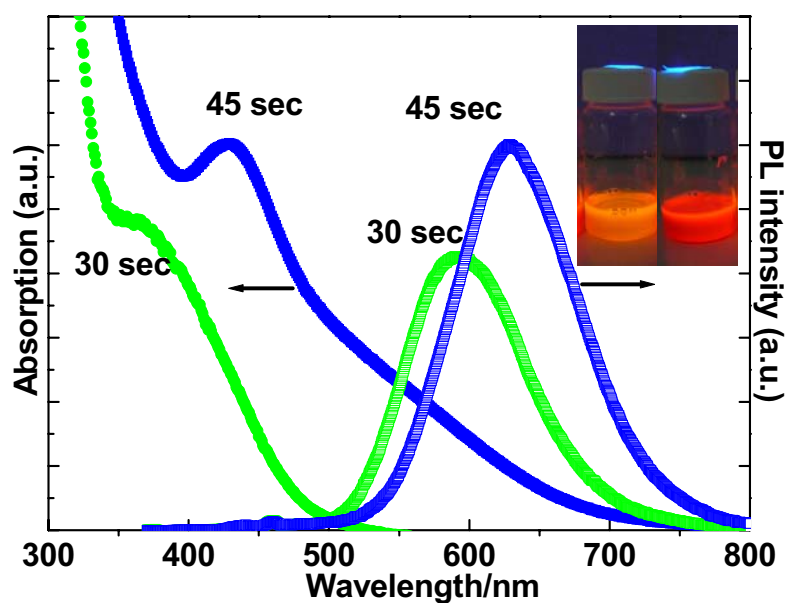

**Figure S1** Absorption (left) and photoluminescence (right) spectra of ZCIS colloids obtained by HFMF in 30 and 45 seconds. Inset shows the visual image of these two ZCIS colloids under a 365 nm UV lamp irradiation.

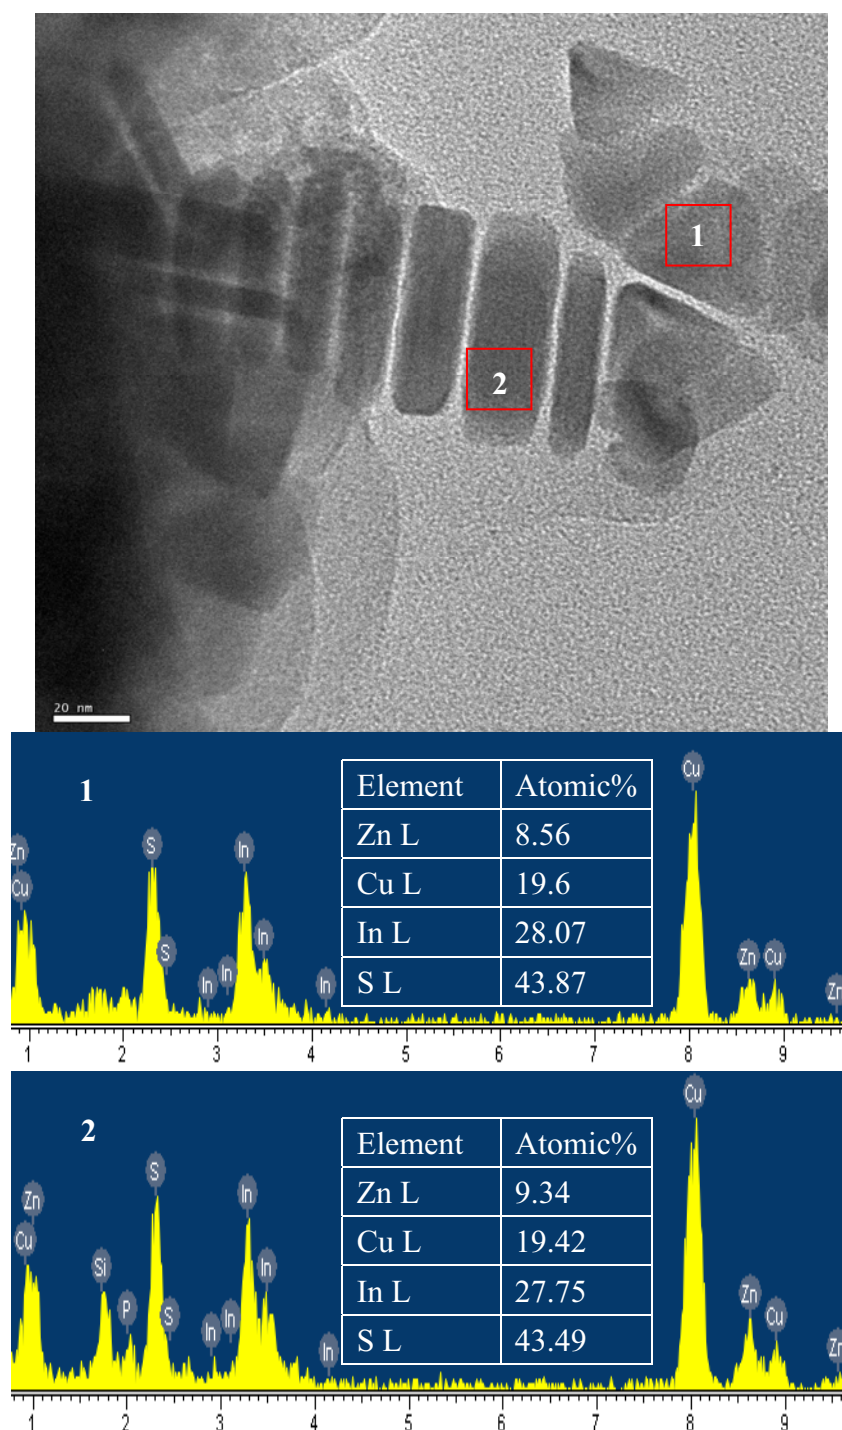

**Figure S2** Energy dispersive X-ray spectra (EDX) and corresponding TEM images of nanobar shaped ZCIS nanocrystals. EDX analysis evidences components of ZCIS nanocrystals. Larger pyramidal shape of ZCIS crystals also found under long-term HFMF exposure, which indicated small pyramidal crystals kept growing along three directions and eventually coexisted with nanorod crystals.

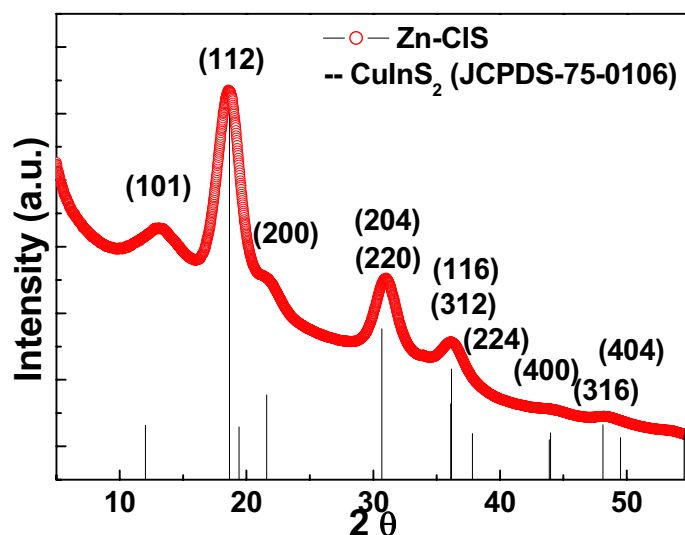

**Figure S3** XRD spectrum of Zn-CIS nanobar by using higher-energy XRD, bottom inset is the chalcopyrite structure  $\text{CuInS}_2$  for comparison.

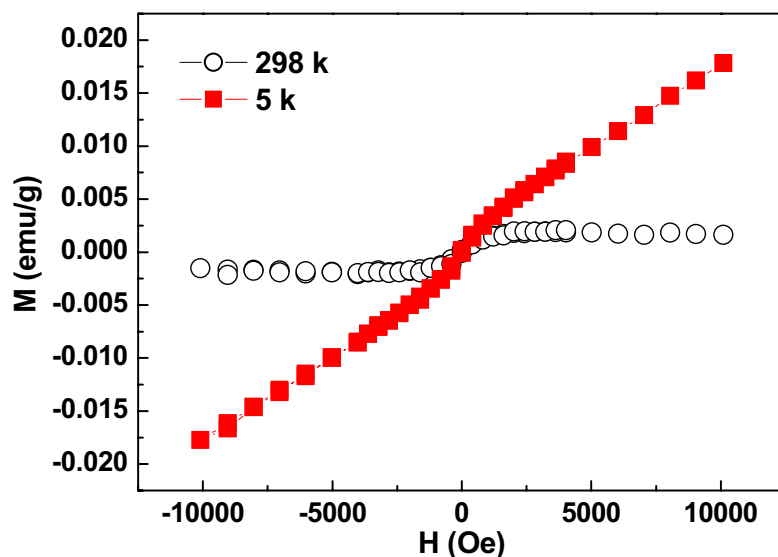

**Figure S4** Magnetization curves measured at different temperature for Zn-CIS QDs.

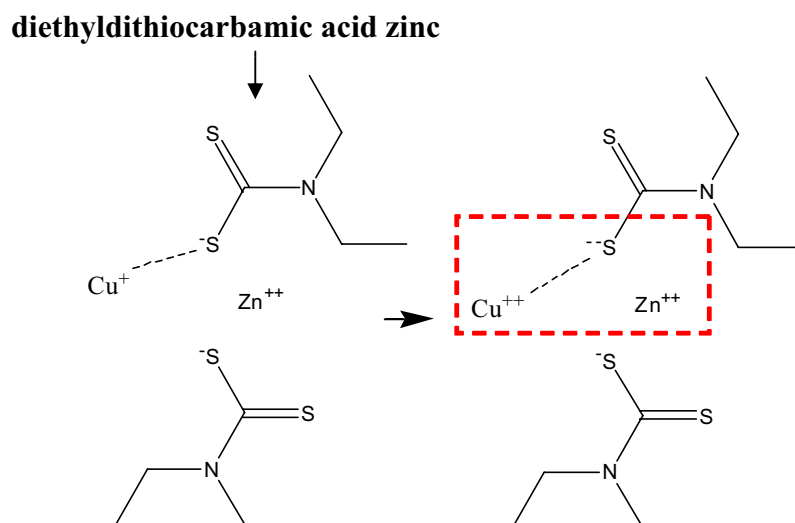

**Scheme S1** Mechanism of “first paramagnetic nanocrystal” formation.

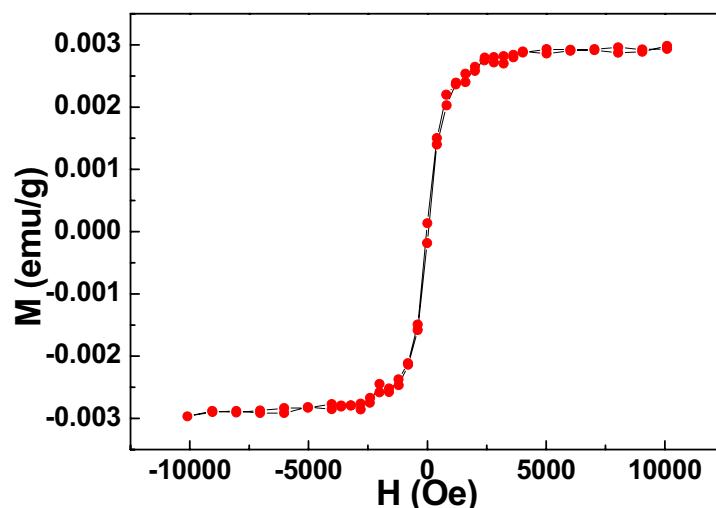

**Figure S5** Magnetization curve of precipitation from Zn and Cu precursors.

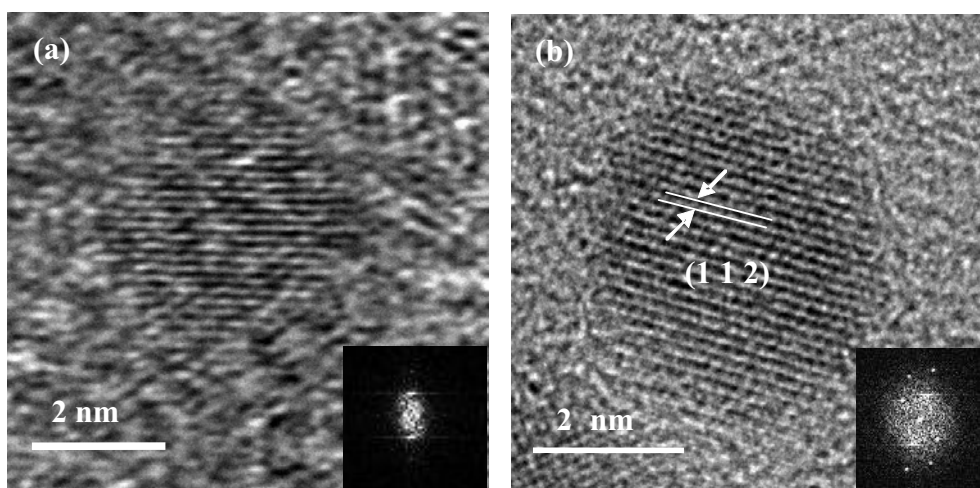

**Figure S6** HR-TEM images of ZCIS nanocrystals synthesized through high-temperature organic solvent method (a) and HFMF (b). This comparison indicated that crystallinity of ZCIS nanoparticles was enhanced by HFMF.

|                 |    |    |    |     |     |     |
|-----------------|----|----|----|-----|-----|-----|
| Time (min)      | 1  | 2  | 3  | 4   | 5   | 7   |
| Temperature(°C) | 65 | 72 | 92 | 138 | 140 | 155 |

**Table 1** Duration time of precursor under high frequency magnetic field and the measured temperature of Zn-CIS precursor.

|                     |                  |                  |              |      |
|---------------------|------------------|------------------|--------------|------|
| Shape               | Particle (30sec) | Particle (45sec) | Cube/Pyramid | Bar  |
| Zeta potential (mV) | 7.25             | 14.3             | 9.36         | 9.74 |

**Table 2** Zeta potential values of different shape Zn-CIS nanocrystals. Particles are the sample obtained under HFMF duration for 30 and 45 seconds which show emission peaks at 590 and 630 nm.
